# Supplementary material
Source: Springer Nature journal article supplement (https://www.springermedizin.de/resource/supplementary/12902_2013_259_MOESM2_ESM.pdf/9515896)
Supplement: MOESM2 [file 9515896]

| Day 0                                | Day 1-90        |                                                               | Day 91-104           | Day 105-195     |                                                               |
|--------------------------------------|-----------------|---------------------------------------------------------------|----------------------|-----------------|---------------------------------------------------------------|
| Screening, consent and randomisation | Dose escalation | Intervention 1<br>Inulin (Group A)<br>OR<br>Placebo (Group B) | Washout<br>(2 weeks) | Dose escalation | Intervention 2<br>Inulin (Group B)<br>OR<br>Placebo (Group A) |

Baseline data collection:  
demographics, medical and social history, anthropometry, diet history, physical activity, collection of blood, urine and stool samples

Post-intervention data collection:  
anthropometry, diet history, physical activity, GIT symptom VAS, collection of blood, urine and stool samples
